# Supplementary material for: Global Analysis of Small RNA Dynamics during Seed Development of Picea glauca and Arabidopsis thaliana Populations Reveals Insights on their Evolutionary Trajectories
Source: PubMed Central journal article supplement (PMC5632664; doi:10.3389/fpls.2017.01719), 2017-10-04
Supplement: DataSheet1.pdf [file DataSheet1.pdf]

**SUPPORTING INFORMATION**

**Global analysis of small RNA dynamics during seed development of *Picea glauca* and *Arabidopsis thaliana* populations reveals insights into their evolutionary trajectories**

Yang Liu, Yousry A. El-Kassaby

**Appendix 1: Additional Methods and Figures**

**Methods S1**

**Figures S1-S8**

## **Methods S1**

### **Exploratory data analysis**

Exploratory data analysis (Martinez et al., 2011) was used to get a sense of the conserved and differentially expressed miRNAs in *P. glauca* and *Arabidopsis* and to delineate the results in bivariate plots with histograms along the diagonal (normality not required), which provided the frequency distribution of each variable, and scatterplot matrices using LOESS procedure in smoothing fitted curves was produced for each off-diagonal panel, which summarized the relationship between the variables (Carr et al., 1987).

### **Sequence module analysis**

As repetitive DNA sequences (e.g., transposable elements, minisatellites, and palindromic sequences) are evolutionarily conserved and have significant functional importances, *MIRNAs* were analyzed by repeat DNA modules using ModuleOrganizer (Tempel and Talla, 2014). Based on our previous assumption regarding the correlation between seed set patterns and seed dormancy variation, we concentrated on miRNA-mRNA nodes and key conserved genes (i.e., *ARF10/16*, *ABI3*, and *DOG1*) responsible for seed dormancy modulation. To investigate those genes of interest annotated in other conifers or *Arabidopsis* but not yet documented in *P. glauca*, BLASTN analysis was performed using the *P. glauca* PlantGDB Putative Unique Transcripts (PUTs) database on ConGenIE (<http://congenie.org/>). These genes are detailed in Table S2. Multiple alignments of transcripts were conducted using ClustalW 2.0 (Larkin et al., 2007). To uncover mRNAs targeted by communally conserved miRNAs between phyla, tBLASTN was executed through *Arabidopsis* proteins with reference to conserved domains/motifs against translated (six frames) nucleotide database and a phylogram was constructed using the maximum likelihood algorithm with 1,000 rounds of bootstrapping, both at default settings, within the MEGA v6.0 software package (Tamura et al., 2013).

## Additional Figures

**Figure S1** Overview of conserved miRNAs expression patterns across seed-set phases of two ecotypes (Cvi-0 and Col-0) in four populations (Pop 1~4) of *P. glauca* (A) and two ecotypes of *Arabidopsis* (B). Green lines are produced using linear regression; red solid and dashed lines are generated via non-parametric regression smoothing original data and the spread (i.e., using the square root of the variance function), respectively. An underscore line links population number to *P. glauca* seed-set phase (e.g., “Pop1\_1” means Population 1 at seed-set timepoint 1) or ecotype to *Arabidopsis* seed-set phase (e.g., “Cvi\_1” denotes Cvi-0 at timepoint 1).

**Figure S2** Analyses of sRNA reads in *P. glauca*

Statistics of unique miRNA read numbers in stacked and compiled libraries by populations (A) and identification of the unique read number in populations (B).

**Figure S3** Analyses of miRNA and sRNA reads in *Arabidopsis*

(A) Statistics of unique read numbers in stacked and compiled libraries for conserved miRNAs and sRNAs (conserved miRNA excluded). (B) Identification of the unique read number in conserved miRNAs and these sRNAs at early (Cvi\_0~7 and Col\_0~4) and late (Cvi\_8~14 and Col\_5~9) maturation.

**Figure S4** Phylogenetic tree of homologs for four genes (*DOG1*, *ABI3*, *ARF10*, and *ARF16*) in gymnosperms and model angiosperms

As per tBLASTN, *DOG1* has a high sequence similarity with *TGA6/2* (i.e., basic leucine zipper TF involved in the activation of SA-responsive genes).

**Figure S5** Nucleotide alignment of *ARF10* between *P. glauca* (BT119832) and *Cycas rumphii* (FN433183)

**Figure S6** The hairpin structures of possible pgl-miR160s by a computational prediction

**Figure S7** Relative expression of key genes in this study by time points at seed set and triplot diagram for RDA (last panel) between relative expression of miRNA-gene combinations (red lines) and environments (blue arrows)

dev\_pattern denotes population or ecotype code and dev\_phase is seed developmental phase.

**Figure S8** The number of repeat modules per “conserved” *MIRNA* (A) and across *MIRNAs* (B) in *P. glauca* and *Arabidopsis*

One or three asterisks represent that the mean between two groups is significant ( $P < 0.05$ ) or highly significant ( $P < 0.001$ ), respectively, using Student *t*-test. The average length of analyzed mature sRNAs is  $21.7 \pm 1.36$  nt and  $21.6 \pm 1.23$  nt in *P. glauca* and *Arabidopsis*, respectively.

**Figure S1**

A) Bivariate plot profiles using conserved miRNAs expression across *Picea glauca* seed set phases of four populations

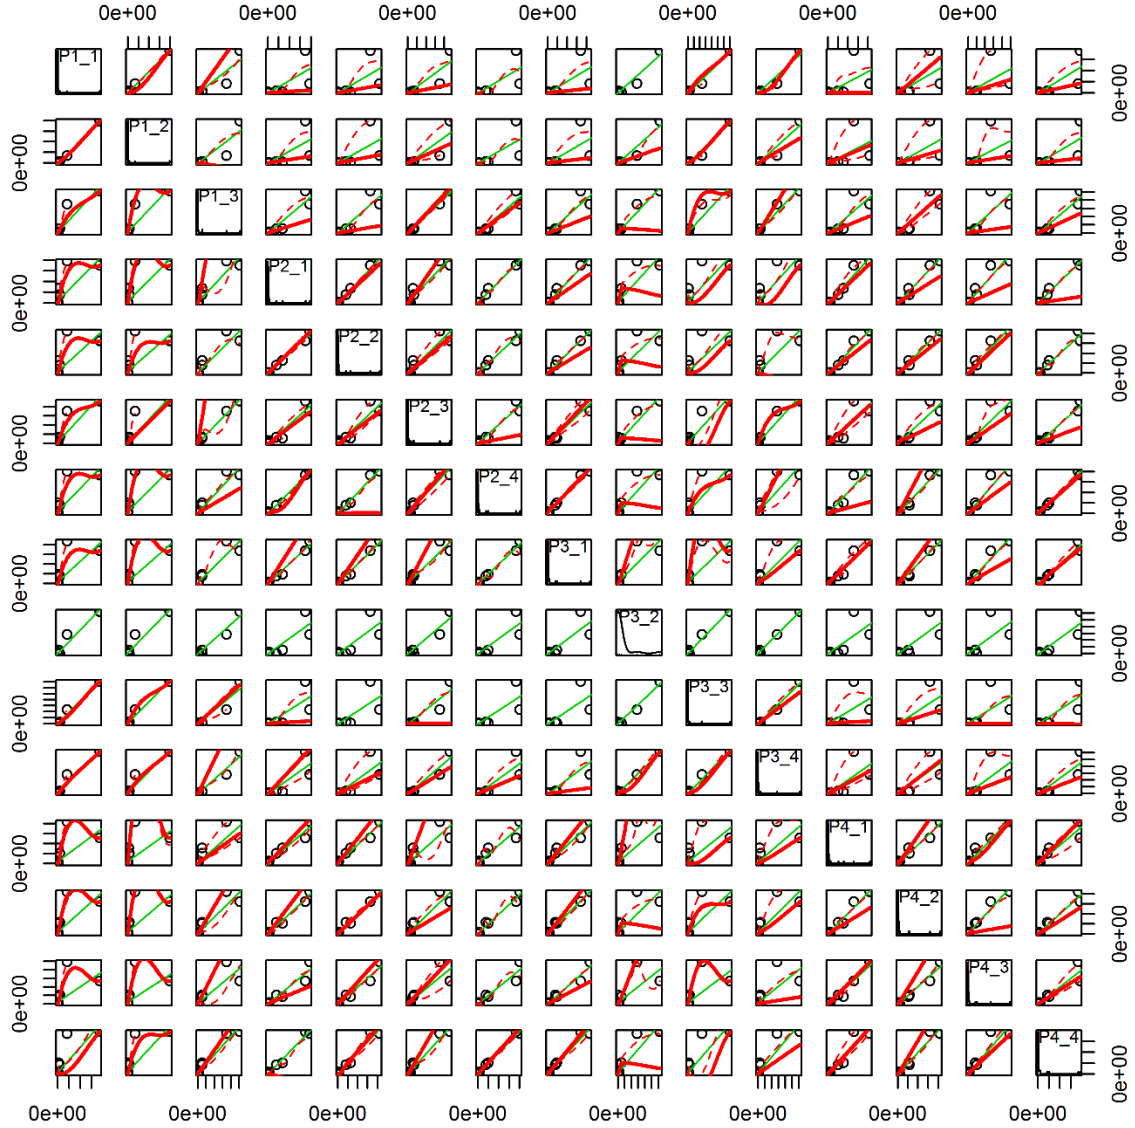

**B)** Bivariate plot profiles using conserved miRNAs expression across *Arabidopsis thaliana* seed-set phases of two ecotypes (Cvi-0 vs. Col-0), respectively

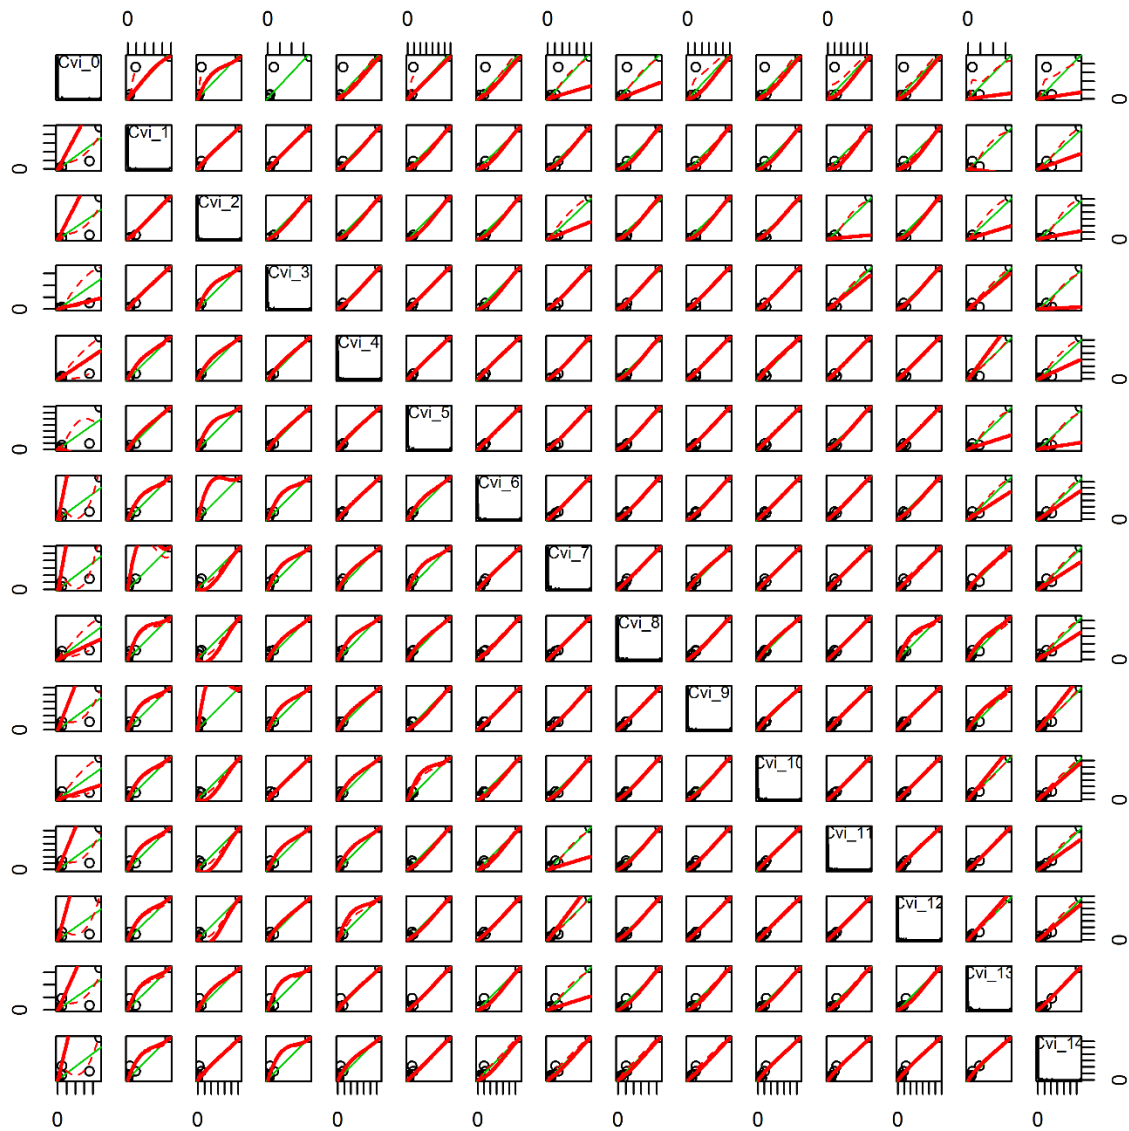

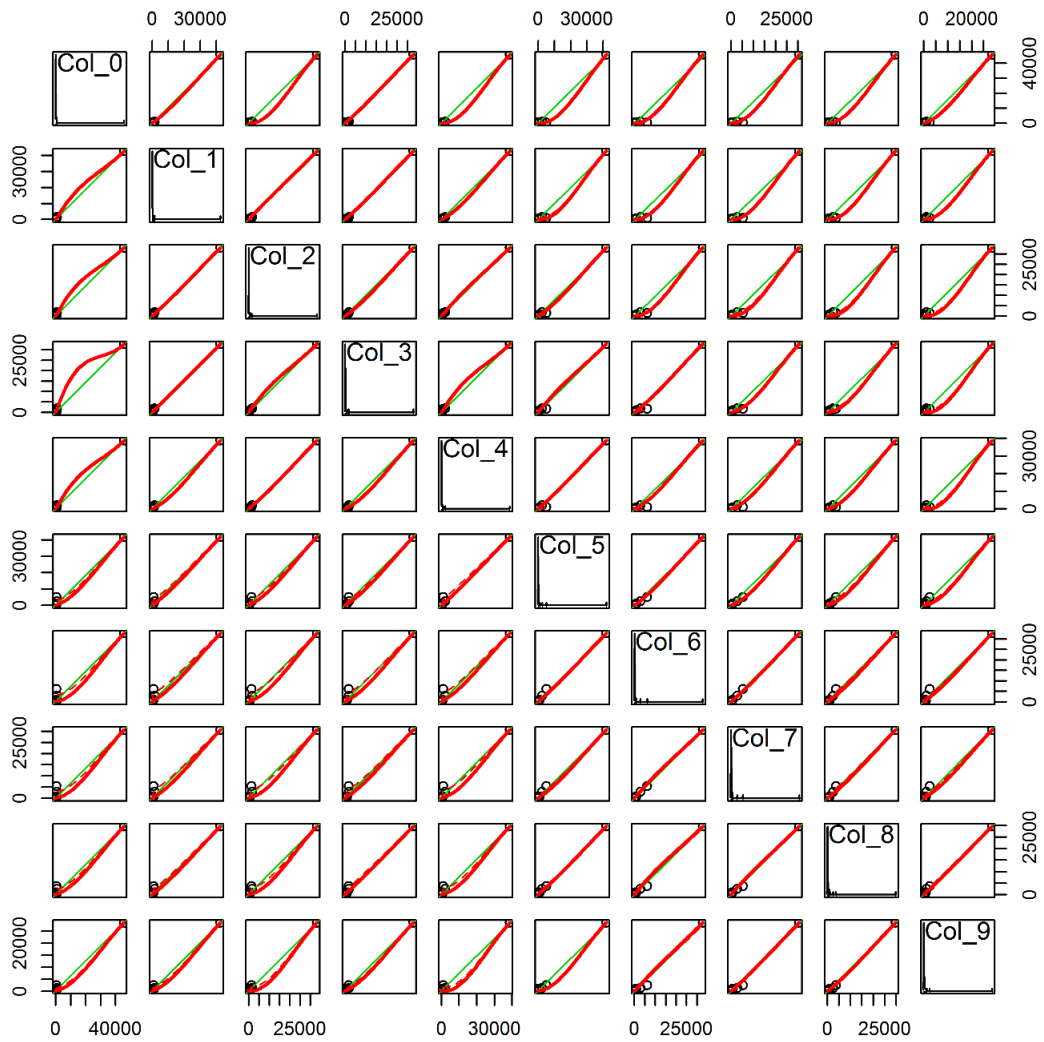

Figure S2

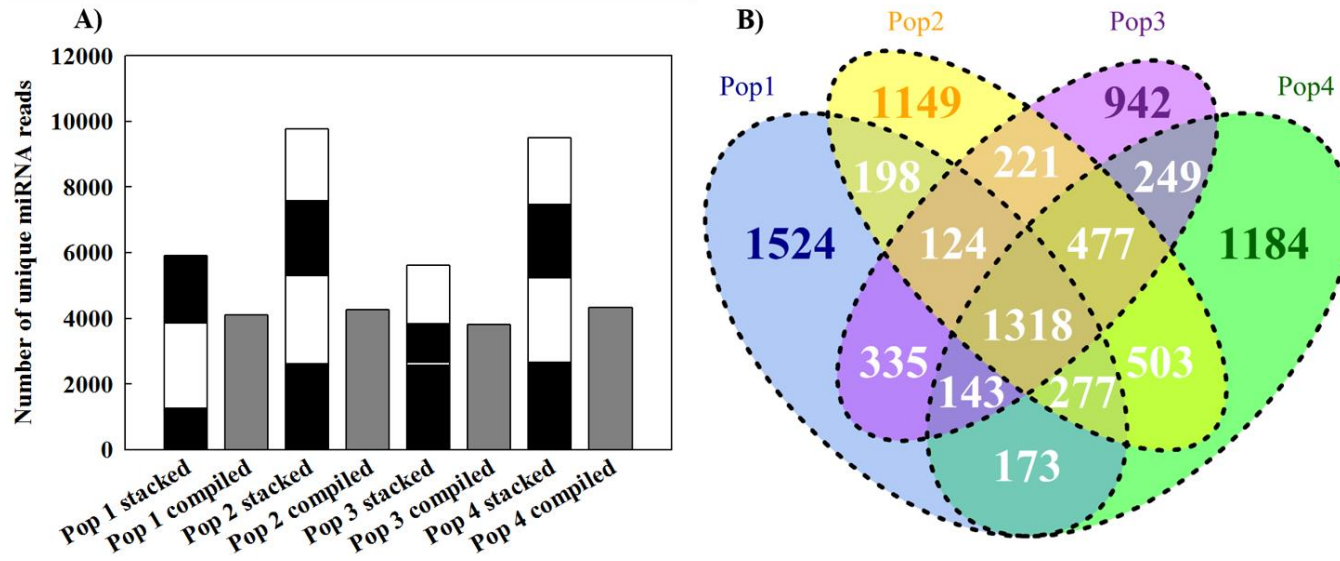



Figure S3

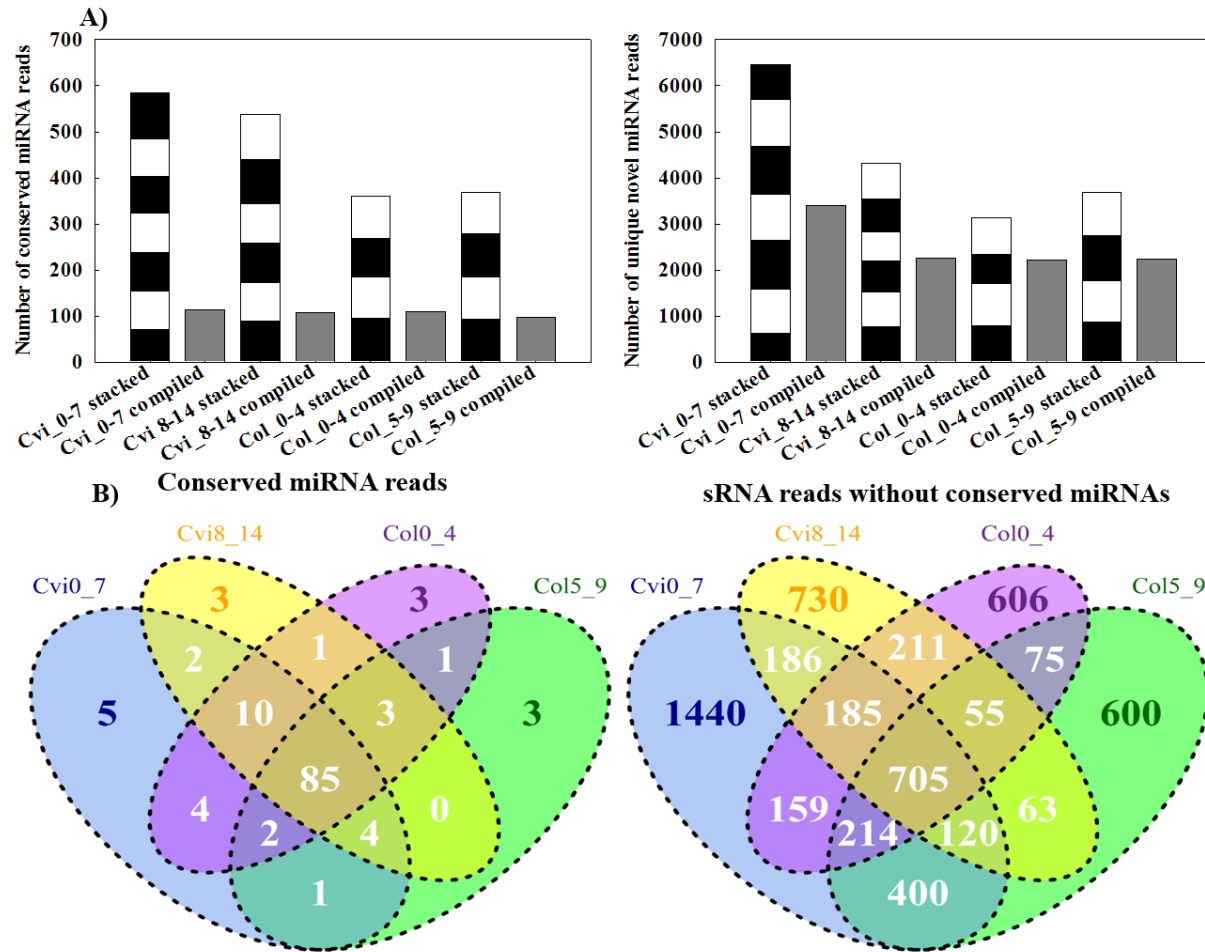

Figure S4

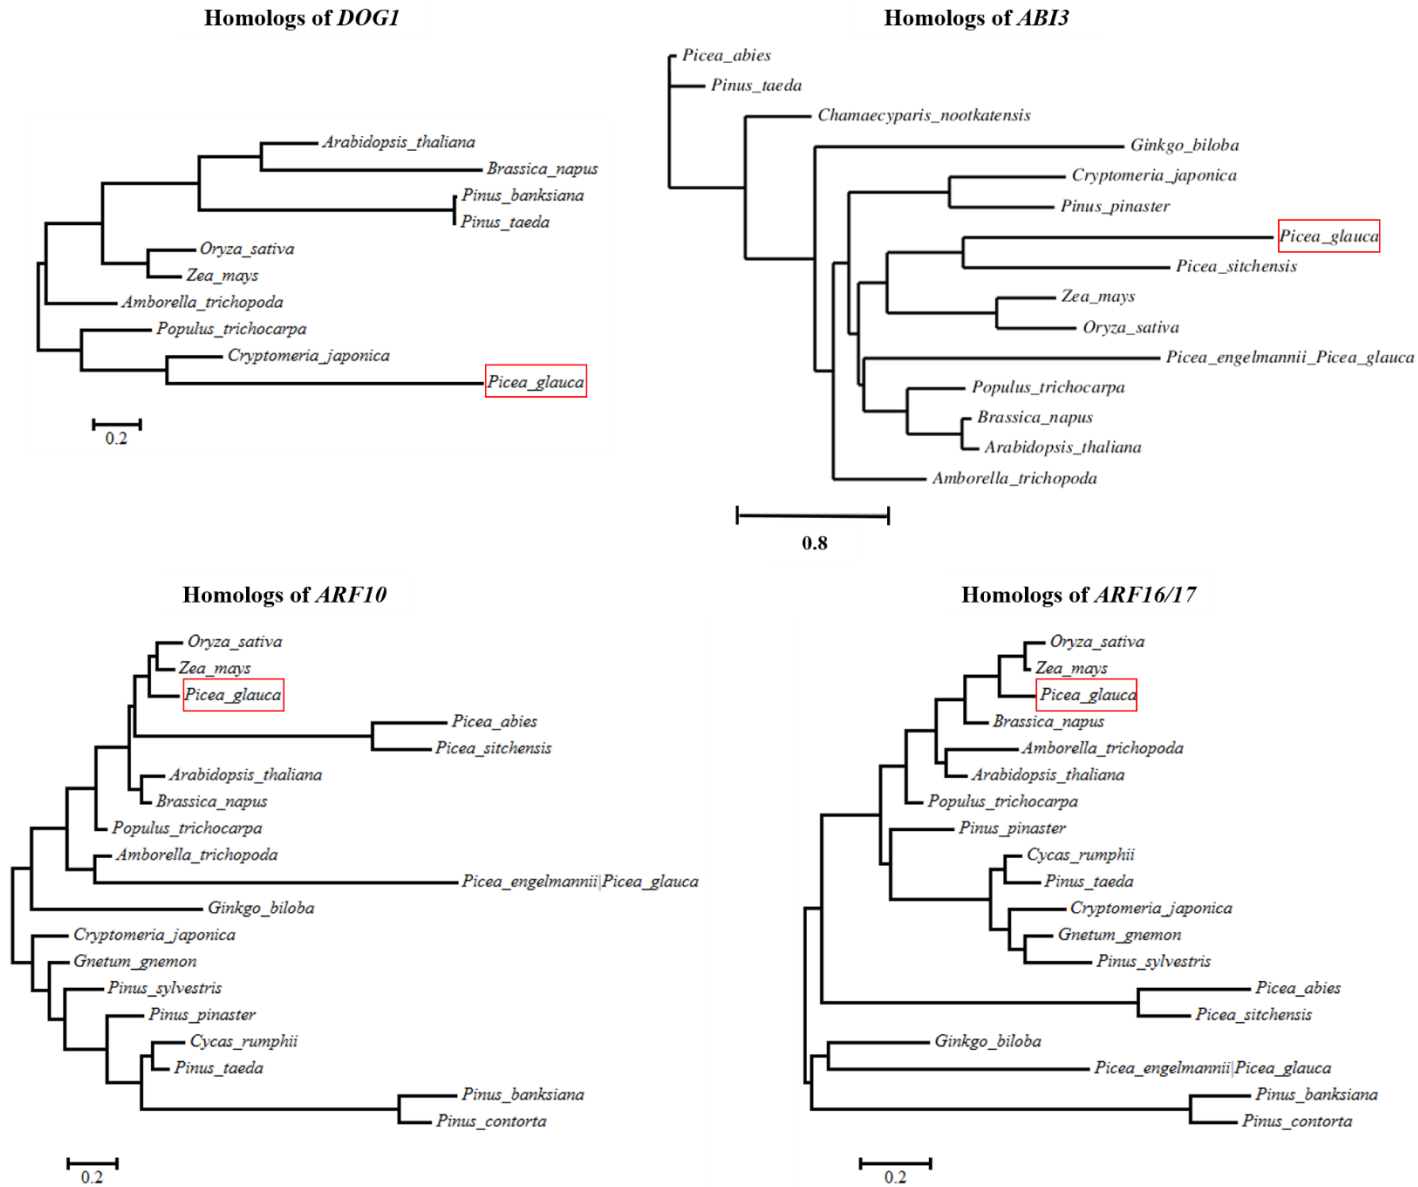

Figure S5

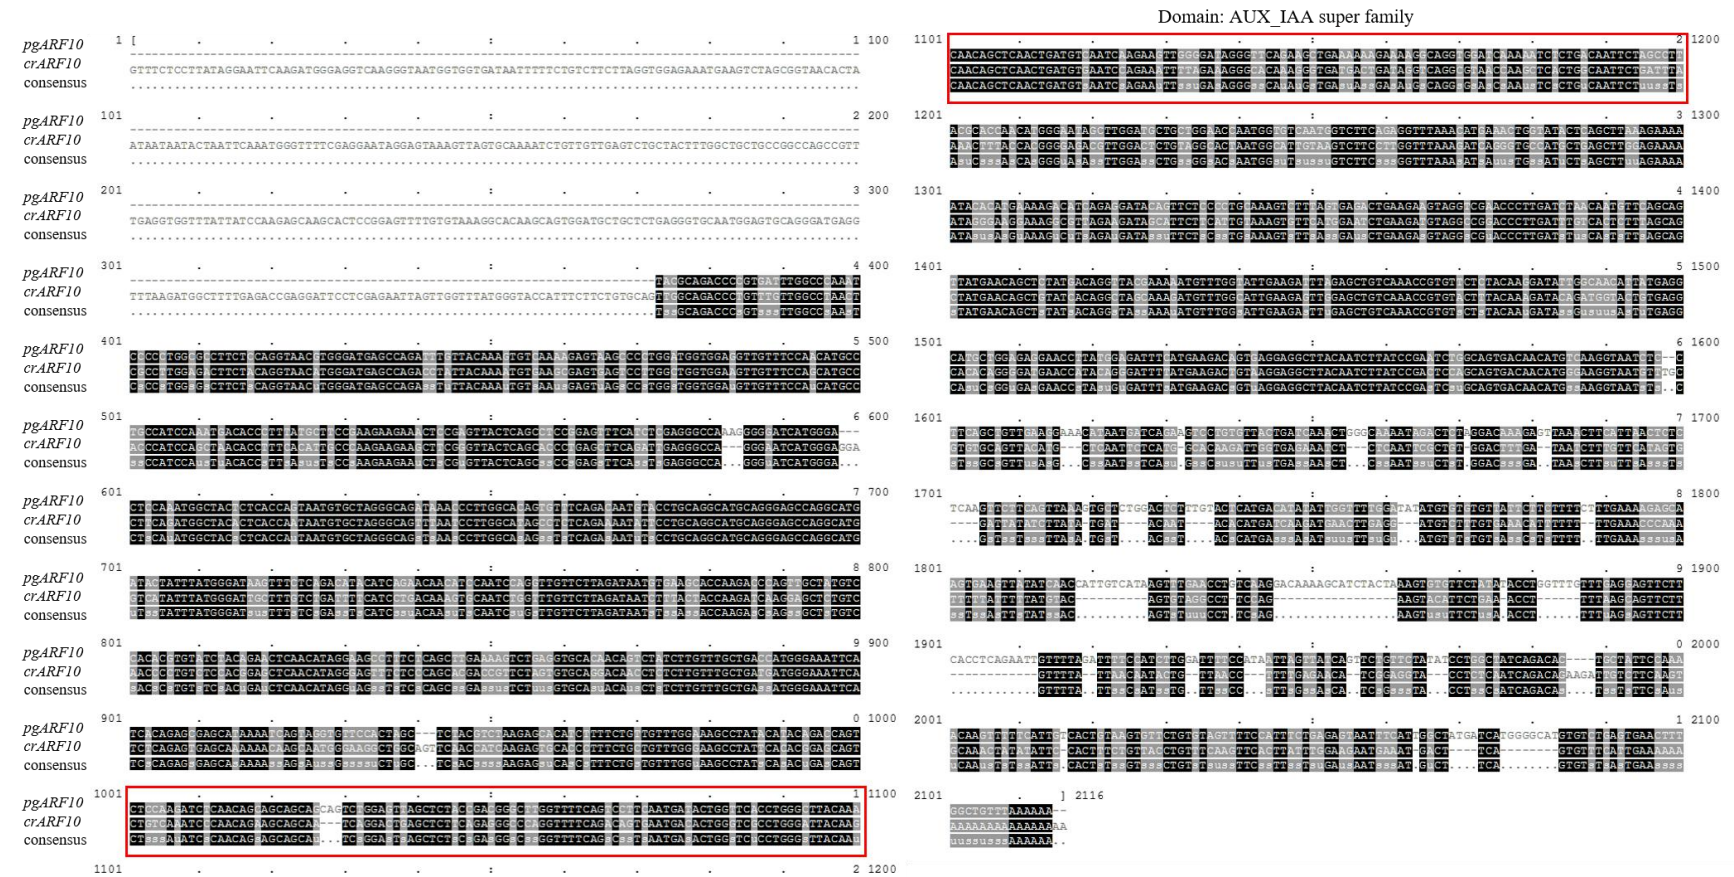

Figure S6

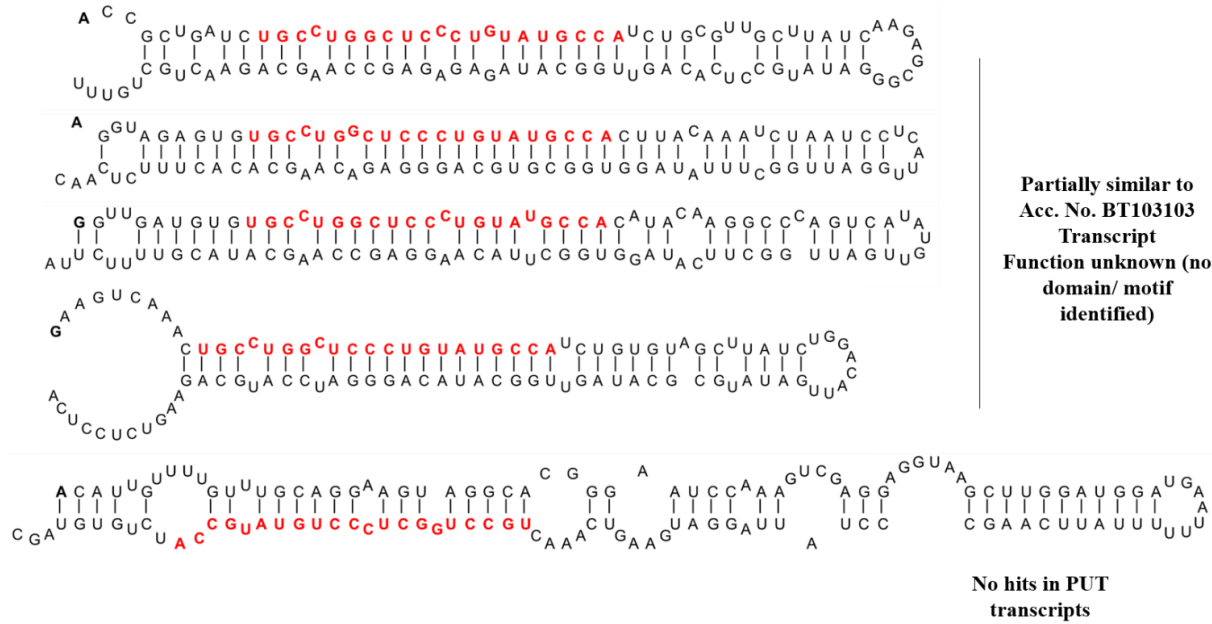

Figure S7

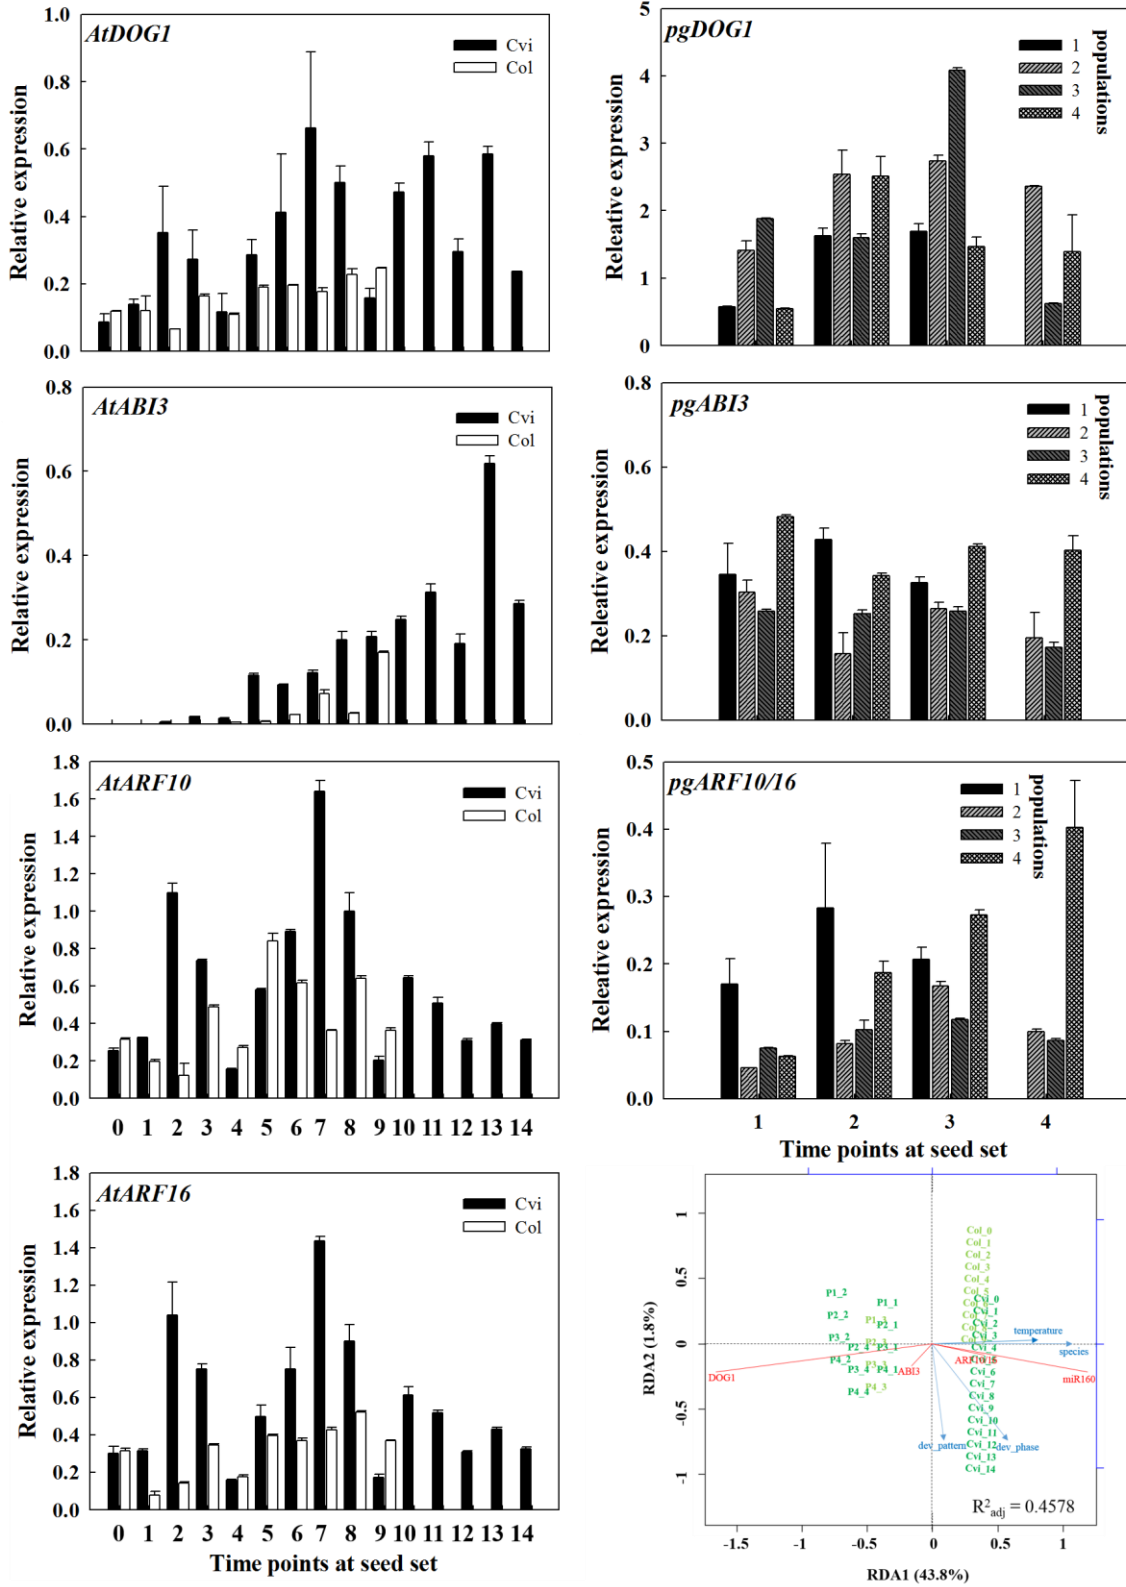

Figure S8

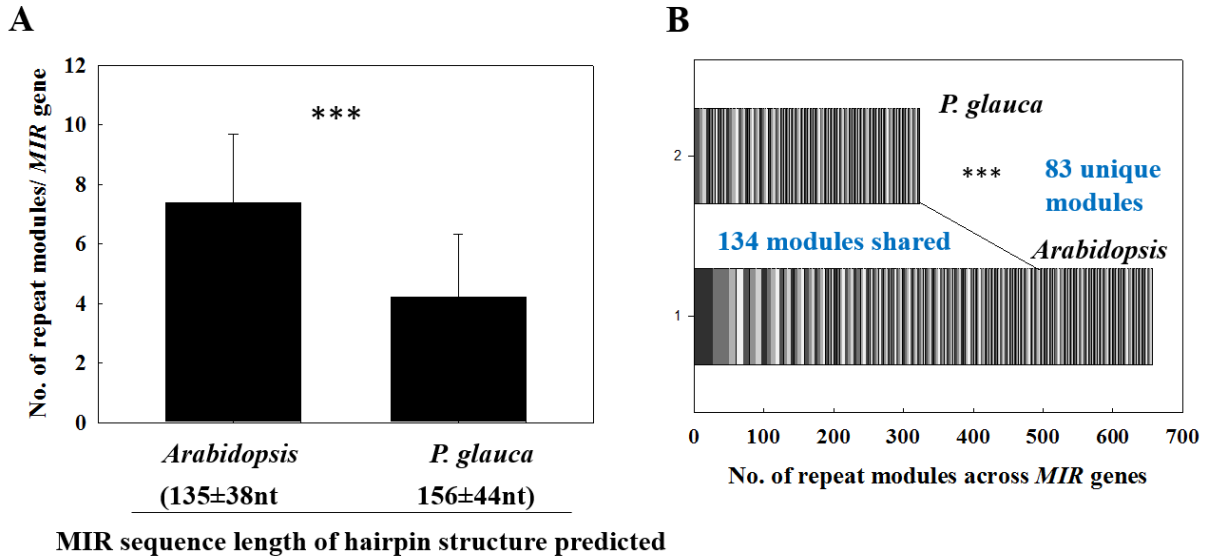

**Description:**

*MIRNAs* usually originate from non-protein-coding fragments. DNA repeat modules are evolutionarily conserved and using *MIRNAs* for enriched sRNAs throughout seed set in *P. glauca* (Table S7) and conserved miRNAs in *Arabidopsis* (Table S8), we found that there were significantly more repeat modules per *MIRNA* in *Arabidopsis* ( $7.4 \pm 2.2$ ) than in *P. glauca* ( $4.1 \pm 2.1$ ) (Figure S8A). 134 repeat modules were identical between *P. glauca* and *Arabidopsis*, while 83 repeats were unique in *Arabidopsis* (Figure S8B). The total number of repeat modules in *Arabidopsis* (656) was significantly higher than in *P. glauca* (323) (Figure S8B). These differences indicate that their *MIRNAs* are subject to divergent evolution, in the sense that transposons, short repeats and other insertions seem targets of differential demethylation (Gehring et al., 2009), allowing changes in the expression pattern of imprinted genes (Pignatta et al., 2014). Two possibilities may result in the *MIRNA* evolution: pre-existing *MIRNAs* evolve and update their functions or new *MIRNAs* emerge to acquire new functions.

## Additional References

- Carr, D.B., Littlefield, R.J., Nicholson, W.L., and Littlefield, J.S. (1987). Scatterplot matrix techniques for large N. *Journal of the American Statistical Association* 82, 424-436.
- Gehring, M., Bubb, K.L., and Henikoff, S. (2009). Extensive demethylation of repetitive elements during seed development underlies gene imprinting. *Science* 324, 1447-1451.
- Larkin, M.A., Blackshields, G., Brown, N.P., Chenna, R., Mcgettigan, P.A., McWilliam, H., Valentin, F., Wallace, I.M., Wilm, A., Lopez, R., Thompson, J.D., Gibson, T.J., and Higgins, D.G. (2007). Clustal W and Clustal X version 2.0. *Bioinformatics* 23, 2947-2948.
- Martinez, W.L., Martinez, A.R., and Solka, J.L. (2011). *Exploratory data analysis with MATLAB (2<sup>nd</sup> ed.)*. Boca Raton, Florida: CRC Press.
- Pignatta, D., Erdmann, R.M., Scheer, E., Picard, C.L., Bell, G.W., and Gehring, M. (2014). Natural epigenetic polymorphisms lead to intraspecific variation in *Arabidopsis* gene imprinting. *eLIFE* 3, e03198.
- Tamura, K., Stecher, G., Peterson, D., FilipSKI, A., and Kumar, S. (2013). MEGA6: Molecular evolutionary genetics analysis version 6.0. *Molecular Biology and Evolution* 30, 2725-2729.
- Tempel, S., and Talla, E. (2014). Visual ModuleOrganizer: A graphical interface for the detection and comparative analysis of repeat DNA modules. *Mobile DNA* 5, 9.
